# Supplementary material
Source: PubMed Central journal article supplement (PMC1560020)
Supplement: rspb20053282s07.pdf [file rspb20053282s07.pdf]

# ELECTRONIC APPENDIX

This is the Electronic Appendix to the article

**Farm Scale Evaluations of spring-sown genetically modified  
herbicide-tolerant crops: a statistical assessment**

by

Suzanne J. Clark, Peter Rothery and Joe N. Perry

*Proc. R. Soc. B* ([doi:10.1098/rspb.2005.3282](https://doi.org/10.1098/rspb.2005.3282))

Electronic appendices are refereed with the text; however, no attempt is made to impose a uniform editorial style on the electronic appendices.

Table A1. Glossary of statistical terms, grouped according to type and approximately in the order they appear in the text.

| term     | definition                                                                                                                                                                                                                                                                                                          |
|----------|---------------------------------------------------------------------------------------------------------------------------------------------------------------------------------------------------------------------------------------------------------------------------------------------------------------------|
| $n_0$    | Originally planned sample size.                                                                                                                                                                                                                                                                                     |
| $n$      | Realized sample size, i.e. number of replicate fields per treatment after exclusion of fields with any missing values or total counts of zero or one.                                                                                                                                                               |
| CV       | Coefficient of variation, i.e. ratio of standard deviation to mean, expressed as a percentage.                                                                                                                                                                                                                      |
| $M$      | Geometric mean of whole-field counts.                                                                                                                                                                                                                                                                               |
| $s$      | Standard deviation of half-field units, calculated as the square-root of the residual mean square from a randomized block ANOVA of the $2n$ half-field units transformed to natural logarithms.                                                                                                                     |
| $V$      | Variance of a population of counts.                                                                                                                                                                                                                                                                                 |
| $\mu$    | Mean of a population of counts.                                                                                                                                                                                                                                                                                     |
| $\alpha$ | Parameter of Taylor's power law, $V = \alpha \mu^\beta$ .                                                                                                                                                                                                                                                           |
| $\beta$  | Exponent of Taylor's power law, $V = \alpha \mu^\beta$ .                                                                                                                                                                                                                                                            |
| $R$      | Multiplicative treatment difference.                                                                                                                                                                                                                                                                                |
| $d$      | Mean of the $n$ differences between half-field counts for each treatment on the logarithmic scale. Test-statistic for $H_0$ and estimate of treatment effect on a logarithmic scale used for reporting results of FSE (corresponds to a variance-mean relationship with $\beta = 2$ ). $R$ is estimated as $10^d$ . |
| $r$      | Logarithm of the ratio of the arithmetic means for each treatment. Test-statistic for $H_0$ and estimate of treatment effect on a logarithmic scale (corresponds to a variance-mean relationship with $\beta = 1$ ).                                                                                                |

|               |                                                                                                                                                                                                                                                                                                                       |
|---------------|-----------------------------------------------------------------------------------------------------------------------------------------------------------------------------------------------------------------------------------------------------------------------------------------------------------------------|
| $d_w$         | Weighted version of $d$ , with weights based on approximate variance of the difference in logarithmically-transformed counts. Test-statistic for $H_0$ (corresponds to a variance-mean relationship with $\beta = 1.5$ ).                                                                                             |
| $r_{1.5}$     | Estimated treatment effect on a logarithmic scale based on a Generalized Linear Model with logarithmic link and variance function $V = \alpha \mu^{1.5}$ (corresponds to a variance-mean relationship with $\beta = 1.5$ ).                                                                                           |
| $p$           | Observed probability level for the test of the null hypothesis based on a Monte Carlo paired randomization test, using the test-statistic $d$ .                                                                                                                                                                       |
| $b$           | The regression coefficient obtained from a linear regression of logarithmically-transformed absolute standardized residuals on logarithmically-transformed fitted values, for any one of the three variance-mean models defined by $\beta = 1, 1.5$ or $2$ .                                                          |
| $\beta_{est}$ | Estimate of the true value of $\beta$ , calculated as $\beta_{est} = 2b + \beta$ , obtained for any one of the three variance-mean models defined by $\beta = 1, 1.5$ or $2$ .                                                                                                                                        |
| $\beta_0$     | Combined estimate of the true value of $\beta$ obtained from the three separate $\beta_{est}$ values. Calculated as $-A/D$ , where $A$ and $D$ are the intercept and regression coefficient, respectively, from a linear regression of the three values of $(\beta_{est} - \beta)/2$ on the three values of $\beta$ . |
| $\theta$      | Estimate of non-centrality parameter, calculated as $\ln(R)/\sqrt{(2s^2/n)}$ .                                                                                                                                                                                                                                        |
| $n_p$         | Projected sample sizes, in various multiples, $k$ , of $n$ , for which power of the $d$ -statistic was estimated.                                                                                                                                                                                                     |
| $n_{80}$      | Sample size required for 80% power for any given value of $R$ .                                                                                                                                                                                                                                                       |
| $N$           | Total number of analyses of count indicators assessed.                                                                                                                                                                                                                                                                |
| $N_{1.5}$     | Number of those $N$ analyses with estimated $R > 1.5$ or estimated                                                                                                                                                                                                                                                    |

$P_{1.5}$   $R < 0.67$ .  
Proportion of the  $N_{1.5}$  analyses that achieved significance at the 5% level.

---

Table A2. Values of  $\beta_0$  (estimate of the exponent in the power-law relationship between variance and mean abundance,  $V = \alpha\mu^\beta$ ),  $n$  (number of fields), CV (coefficient of variation),  $s$  (natural logarithmic scale) and  $M$  (whole-field geometric mean) for analyses of count indicators grouped according to the primary FSE papers: aerial = Haughton *et al.* (2003), tables 2-7; boundary = Roy *et al.* (2003), tables 6-9; surface = Brooks *et al.* (2003), tables 1-4 & 6; trophic = Hawes *et al.* (2003), tables 4-7; vegetation = Heard *et al.* (2003), tables 2, 4 & 5 (year  $t$  only). Crops: b = beet; m = maize; s = spring oilseed rape. Pollinators = bees and butterflies.

| group  | table # | crop | taxa/group/occasion   | period                | $\beta_0$ | $n$  | CV%   | $s$   | $M$   |       |
|--------|---------|------|-----------------------|-----------------------|-----------|------|-------|-------|-------|-------|
| aerial | 2       | b    | total bees            | year                  | 1.30      | 20   | 88.2  | 0.88  | 2.43  |       |
|        |         |      | <i>Apis mellifera</i> | year                  | 1.41      | 7    | 21.4  | 0.22  | 1.98  |       |
|        |         |      | bumble bees           | year                  | 1.72      | 18   | 88.0  | 0.88  | 1.72  |       |
|        |         |      | long-tongued bees     | year                  | 1.94      | 5    | 9.7   | 0.10  | 0.65  |       |
|        |         | m    | total bees            | year                  | -1.40     | 15   | 115.7 | 1.15  | 1.57  |       |
|        |         |      | <i>Apis mellifera</i> | year                  | 4.47      | 3    | 168.4 | 1.68  | 1.99  |       |
|        |         |      | bumble bees           | year                  | -3.64     | 14   | 105.3 | 1.05  | 1.51  |       |
|        |         |      | total bees            | year                  | 1.52      | 62   | 64.9  | 0.65  | 40.21 |       |
|        | 3       | b    | s                     | <i>Apis mellifera</i> | year      | 1.62 | 51    | 103.0 | 1.03  | 10.02 |
|        |         |      |                       | bumble bees           | year      | 1.41 | 62    | 64.5  | 0.64  | 24.31 |
|        |         |      |                       | long-tongued bees     | year      | 1.14 | 38    | 63.3  | 0.63  | 2.33  |
|        |         |      |                       | total butterflies     | year      | 1.16 | 58    | 57.3  | 0.57  | 4.70  |
|        |         |      | m                     | total butterflies     | May       | 3.38 | 5     | 80.4  | 0.80  | 1.07  |
|        |         |      |                       | total butterflies     | June      | 1.96 | 11    | 64.5  | 0.64  | 1.80  |
|        |         |      |                       | total butterflies     | July      | 1.16 | 32    | 66.9  | 0.67  | 2.34  |
|        |         |      |                       | total butterflies     | Aug       | 1.53 | 51    | 64.4  | 0.64  | 3.05  |
| m      | b       | s    | total butterflies     | year                  | 1.65      | 35   | 64.3  | 0.65  | 3.51  |       |
|        |         |      | total butterflies     | June                  | 1.48      | 6    | 54.5  | 0.55  | 1.14  |       |
|        |         |      | total butterflies     | July                  | 0.84      | 15   | 30.0  | 0.30  | 2.48  |       |
|        |         |      | total butterflies     | Aug                   | 1.88      | 28   | 76.8  | 0.77  | 2.55  |       |

|   |   |                    |      |       |    |      |      |       |
|---|---|--------------------|------|-------|----|------|------|-------|
|   | s | total butterflies  | year | 1.44  | 65 | 42.4 | 0.42 | 14.17 |
|   |   |                    | June | 1.36  | 34 | 63.2 | 0.64 | 3.72  |
|   |   |                    | July | 0.89  | 49 | 70.6 | 0.71 | 4.03  |
|   |   |                    | Aug  | 1.42  | 54 | 54.6 | 0.55 | 9.00  |
|   |   | <i>Pieris</i>      | year | 1.44  | 65 | 47.2 | 0.47 | 12.42 |
|   |   |                    | June | 0.95  | 34 | 68.1 | 0.68 | 3.47  |
|   |   |                    | July | 1.28  | 44 | 73.3 | 0.73 | 3.52  |
|   |   |                    | Aug  | 1.68  | 52 | 55.4 | 0.55 | 8.98  |
|   |   | non- <i>Pieris</i> | year | 1.19  | 42 | 68.8 | 0.69 | 1.84  |
|   |   |                    | June | 0.96  | 3  | 60.6 | 0.61 | 1.66  |
|   |   |                    | July | 1.03  | 25 | 61.9 | 0.62 | 1.75  |
|   |   |                    | Aug  | 1.85  | 15 | 85.1 | 0.85 | 1.73  |
| 4 | b | total Araneae      | year | 0.90  | 64 | 53.6 | 0.53 | 8.71  |
|   |   | Linyphiidae        | year | 1.29  | 59 | 53.2 | 0.53 | 3.90  |
|   |   |                    | June | 0.99  | 23 | 76.8 | 0.77 | 1.90  |
|   |   |                    | Aug  | 1.04  | 57 | 50.3 | 0.50 | 3.20  |
|   |   | <i>L. tenuis</i>   | year | 1.66  | 26 | 60.6 | 0.61 | 1.61  |
|   | m | total Araneae      | year | 2.07  | 55 | 61.0 | 0.60 | 6.30  |
|   |   | Linyphiidae        | year | 2.41  | 41 | 75.1 | 0.75 | 3.05  |
|   |   | <i>L. tenuis</i>   | year | 16.54 | 10 | 94.1 | 0.94 | 1.80  |
|   | s | total Araneae      | year | 2.09  | 64 | 52.6 | 0.52 | 7.68  |
|   |   |                    | June | 2.25  | 44 | 63.9 | 0.64 | 2.38  |
|   |   |                    | Aug  | 1.92  | 59 | 59.2 | 0.59 | 6.27  |
|   |   | Linyphiidae        | year | 1.32  | 62 | 65.9 | 0.65 | 3.82  |
|   |   |                    | June | 1.33  | 30 | 69.8 | 0.70 | 2.09  |
|   |   |                    | Aug  | 1.71  | 56 | 66.5 | 0.67 | 3.15  |
|   |   | <i>L. tenuis</i>   | year | 1.65  | 32 | 60.3 | 0.60 | 1.64  |
| 5 | b | total Collembola   | year | 2.45  | 64 | 61.6 | 0.61 | 62.76 |
|   |   |                    | June | 1.82  | 54 | 80.7 | 0.80 | 17.76 |
|   |   |                    | Aug  | 2.23  | 62 | 67.6 | 0.68 | 42.67 |

|   |  |                  |      |      |    |       |      |        |
|---|--|------------------|------|------|----|-------|------|--------|
|   |  | Entomobryidae    | year | 1.96 | 64 | 78.9  | 0.79 | 20.13  |
|   |  |                  | June | 1.89 | 47 | 88.0  | 0.88 | 4.95   |
|   |  |                  | Aug  | 1.92 | 61 | 83.3  | 0.84 | 16.20  |
|   |  | Isotomidae       | year | 2.02 | 58 | 77.8  | 0.78 | 12.25  |
|   |  | Sminthuridae     | year | 1.72 | 55 | 72.5  | 0.72 | 14.72  |
|   |  |                  | June | 1.72 | 45 | 96.6  | 0.96 | 8.06   |
|   |  |                  | Aug  | 1.78 | 48 | 68.7  | 0.69 | 6.87   |
| m |  | total Collembola | year | 1.64 | 57 | 76.9  | 0.77 | 95.01  |
|   |  |                  | June | 2.07 | 52 | 89.9  | 0.90 | 33.17  |
|   |  |                  | Aug  | 1.38 | 53 | 90.5  | 0.90 | 50.88  |
|   |  | Entomobryidae    | year | 1.96 | 55 | 76.9  | 0.77 | 28.31  |
|   |  |                  | June | 2.31 | 49 | 92.3  | 0.92 | 7.33   |
|   |  |                  | Aug  | 1.52 | 51 | 96.1  | 0.97 | 19.09  |
|   |  | Isotomidae       | year | 1.83 | 54 | 99.9  | 1.01 | 25.08  |
|   |  |                  | June | 2.25 | 43 | 106.5 | 1.07 | 9.30   |
|   |  |                  | Aug  | 1.68 | 49 | 110.5 | 1.11 | 15.65  |
|   |  | Sminthuridae     | year | 1.65 | 53 | 99.6  | 1.00 | 15.47  |
|   |  |                  | June | 1.96 | 47 | 99.7  | 0.99 | 11.57  |
|   |  |                  | Aug  | 1.59 | 41 | 91.0  | 0.91 | 6.43   |
| s |  | total Collembola | year | 2.08 | 64 | 65.8  | 0.66 | 121.78 |
|   |  |                  | June | 2.58 | 55 | 90.3  | 0.91 | 31.90  |
|   |  |                  | Aug  | 2.10 | 60 | 53.6  | 0.54 | 87.07  |
|   |  | Entomobryidae    | year | 1.73 | 61 | 62.3  | 0.62 | 36.86  |
|   |  |                  | June | 2.06 | 44 | 83.3  | 0.83 | 6.68   |
|   |  |                  | Aug  | 1.95 | 56 | 64.4  | 0.65 | 37.44  |
|   |  | Isotomidae       | year | 1.73 | 60 | 78.5  | 0.78 | 37.13  |
|   |  |                  | June | 2.01 | 45 | 90.2  | 0.91 | 15.24  |
|   |  |                  | Aug  | 1.81 | 55 | 81.3  | 0.81 | 25.85  |
|   |  | Sminthuridae     | year | 2.01 | 57 | 101.6 | 1.02 | 17.52  |
|   |  |                  | June | 2.06 | 48 | 111.6 | 1.12 | 13.00  |

|          |   |                          |                   |       |      |      |      |      |       |
|----------|---|--------------------------|-------------------|-------|------|------|------|------|-------|
|          |   |                          | Aug               | 2.40  | 46   | 96.3 | 0.96 | 6.69 |       |
| 6        | b | total Heteroptera        | year              | 1.32  | 48   | 84.6 | 0.85 | 3.84 |       |
|          |   | herbivores               | year              | 2.40  | 11   | 68.7 | 0.69 | 1.58 |       |
|          |   | predators                | year              | 1.74  | 26   | 79.3 | 0.80 | 1.89 |       |
|          | m | total Heteroptera        | year              | 2.22  | 42   | 92.7 | 0.93 | 3.33 |       |
|          |   | herbivores               | year              | 0.76  | 7    | 62.0 | 0.62 | 1.16 |       |
|          |   | predators                | year              | -0.62 | 35   | 77.3 | 0.77 | 1.96 |       |
|          | s | total Heteroptera        | year              | 1.36  | 41   | 69.8 | 0.70 | 4.40 |       |
|          |   | herbivores               | year              | 0.68  | 9    | 67.0 | 0.67 | 1.25 |       |
|          |   | predators                | year              | 1.26  | 31   | 72.6 | 0.73 | 2.81 |       |
| 7        | b | total Carabidae          | year              | 1.72  | 57   | 61.3 | 0.61 | 4.04 |       |
|          |   |                          | June              | 0.96  | 25   | 68.6 | 0.68 | 2.05 |       |
|          |   |                          | Aug               | 1.14  | 52   | 61.0 | 0.61 | 3.39 |       |
|          |   | <i>B. lampros</i>        | year              | 6.05  | 34   | 69.9 | 0.70 | 1.53 |       |
|          |   | <i>B. obtusum</i>        | year              | 1.48  | 20   | 64.7 | 0.65 | 1.92 |       |
|          |   | <i>T. quadristriatus</i> | year              | 1.17  | 22   | 69.0 | 0.69 | 1.53 |       |
|          | m | total Carabidae          | year              | 1.61  | 43   | 54.0 | 0.54 | 3.69 |       |
|          |   |                          | June              | 1.32  | 19   | 74.4 | 0.75 | 1.52 |       |
|          |   |                          | Aug               | 1.46  | 38   | 58.6 | 0.58 | 3.21 |       |
|          |   | <i>B. lampros</i>        | year              | 1.40  | 21   | 77.0 | 0.77 | 1.59 |       |
|          |   | <i>B. obtusum</i>        | year              | 1.50  | 11   | 69.0 | 0.69 | 2.35 |       |
|          |   | <i>T. quadristriatus</i> | year              | 2.70  | 11   | 74.9 | 0.75 | 1.28 |       |
|          | s | total Carabidae          | year              | 2.57  | 54   | 57.2 | 0.57 | 3.52 |       |
|          |   | <i>B. lampros</i>        | year              | 0.49  | 23   | 59.5 | 0.59 | 2.00 |       |
|          |   | <i>B. obtusum</i>        | year              | 1.98  | 17   | 83.5 | 0.83 | 1.46 |       |
|          |   | <i>T. quadristriatus</i> | year              | 1.40  | 21   | 73.3 | 0.73 | 1.32 |       |
| boundary | 6 | b                        | total butterflies | year  | 1.45 | 66   | 62.1 | 0.62 | 10.17 |
|          |   |                          | May               | 0.75  | 25   | 67.9 | 0.68 | 2.00 |       |
|          |   |                          | June              | 1.16  | 22   | 69.2 | 0.69 | 1.48 |       |
|          |   |                          | July              | 1.50  | 54   | 79.8 | 0.80 | 4.28 |       |



|   |                            |      |      |    |      |      |       |
|---|----------------------------|------|------|----|------|------|-------|
|   |                            | Aug  | 1.57 | 58 | 68.4 | 0.68 | 4.71  |
|   | <i>Pieris brassicae</i>    | year | 1.18 | 37 | 78.6 | 0.78 | 2.20  |
|   | <i>Pieris rapae</i>        | year | 1.69 | 51 | 65.8 | 0.66 | 3.67  |
|   | <i>Pieris napi</i>         | year | 2.01 | 24 | 66.9 | 0.67 | 1.77  |
|   | <i>Aglais urticae</i>      | year | 1.13 | 31 | 91.3 | 0.92 | 2.24  |
|   | <i>Inachis io</i>          | year | 1.30 | 16 | 83.2 | 0.83 | 1.70  |
|   | <i>Maniola jurtina</i>     | year | 1.80 | 34 | 57.9 | 0.58 | 2.32  |
| m | total butterflies          | year | 1.56 | 56 | 57.5 | 0.57 | 11.44 |
|   | <i>Pieris brassicae</i>    | year | 1.15 | 32 | 65.7 | 0.65 | 2.31  |
|   | <i>Pieris rapae</i>        | year | 1.54 | 44 | 53.5 | 0.54 | 3.45  |
|   | <i>Pieris napi</i>         | year | 1.27 | 14 | 61.3 | 0.62 | 2.36  |
|   | <i>Aglais urticae</i>      | year | 1.51 | 27 | 82.9 | 0.83 | 2.20  |
|   | <i>Inachis io</i>          | year | 1.92 | 18 | 72.9 | 0.73 | 1.37  |
|   | <i>Pyronia tithonus</i>    | year | 0.97 | 23 | 93.2 | 0.93 | 1.97  |
|   | <i>Maniola jurtina</i>     | year | 2.40 | 36 | 72.1 | 0.72 | 2.46  |
|   | <i>Aphantopus</i>          | year |      |    |      |      |       |
|   | <i>hyperantus</i>          |      | 1.10 | 16 | 79.6 | 0.79 | 1.83  |
| s | total butterflies          | year | 1.15 | 67 | 49.2 | 0.49 | 21.20 |
|   |                            | June | 1.29 | 42 | 74.3 | 0.74 | 2.44  |
|   |                            | July | 1.37 | 57 | 64.1 | 0.64 | 7.11  |
|   |                            | Aug  | 1.69 | 64 | 51.5 | 0.52 | 11.98 |
|   | <i>Pieris</i> species      | year | 1.06 | 67 | 51.8 | 0.52 | 14.83 |
|   |                            | June | 1.02 | 37 | 81.2 | 0.81 | 2.36  |
|   |                            | July | 0.73 | 51 | 59.7 | 0.59 | 4.04  |
|   |                            | Aug  | 1.80 | 61 | 59.7 | 0.60 | 10.07 |
|   | non- <i>Pieris</i> species | year | 1.65 | 61 | 63.3 | 0.64 | 5.48  |
|   |                            | June | 0.70 | 7  | 72.2 | 0.72 | 1.03  |
|   |                            | July | 1.46 | 48 | 77.5 | 0.78 | 3.83  |
|   |                            | Aug  | 1.59 | 47 | 57.7 | 0.58 | 2.54  |
|   | <i>Pieris brassicae</i>    | year | 1.55 | 52 | 80.5 | 0.81 | 3.81  |

|   |   |                         |      |       |    |       |      |      |
|---|---|-------------------------|------|-------|----|-------|------|------|
|   |   | <i>Pieris rapae</i>     | year | 1.61  | 65 | 50.7  | 0.51 | 9.88 |
|   |   | <i>Pieris napi</i>      | year | 1.41  | 31 | 78.3  | 0.78 | 1.79 |
|   |   | <i>Inachis io</i>       | year | 2.02  | 16 | 69.9  | 0.70 | 1.53 |
|   |   | <i>Aglais urticae</i>   | year | 3.39  | 29 | 87.4  | 0.88 | 1.97 |
|   |   | <i>Pyronia tithonus</i> | year | 0.08  | 13 | 72.6  | 0.73 | 2.23 |
|   |   | <i>Maniola jurtina</i>  | year | 1.14  | 31 | 79.9  | 0.80 | 2.20 |
|   |   | <i>Aphantopus</i>       | year |       |    |       |      |      |
|   |   | <i>hyperantus</i>       |      | -0.55 | 23 | 80.8  | 0.80 | 2.76 |
| 7 | b | total bees              | year | 1.51  | 63 | 87.6  | 0.88 | 8.61 |
|   |   |                         | May  | 0.81  | 19 | 87.6  | 0.87 | 1.29 |
|   |   |                         | June | 1.08  | 35 | 88.4  | 0.89 | 2.66 |
|   |   |                         | July | 1.47  | 47 | 88.3  | 0.88 | 4.02 |
|   |   |                         | Aug  | 2.12  | 44 | 106.2 | 1.06 | 2.86 |
|   |   | <i>Apis mellifera</i>   | year | 1.64  | 26 | 101.4 | 1.01 | 2.50 |
|   |   |                         | June | 0.37  | 13 | 75.6  | 0.76 | 1.48 |
|   |   |                         | July | 1.32  | 13 | 100.4 | 1.00 | 2.00 |
|   |   | bumble bees             | year | 1.21  | 63 | 86.4  | 0.87 | 6.91 |
|   |   |                         | May  | 0.78  | 15 | 90.7  | 0.91 | 1.26 |
|   |   |                         | June | 1.06  | 30 | 75.6  | 0.76 | 2.28 |
|   |   |                         | July | 1.29  | 46 | 89.6  | 0.89 | 3.46 |
|   |   |                         | Aug  | 2.06  | 41 | 106.6 | 1.06 | 2.71 |
|   |   | long-tongued bees       | year | 1.53  | 45 | 93.3  | 0.93 | 2.88 |
|   |   |                         | June | 1.41  | 18 | 64.8  | 0.65 | 1.40 |
|   |   |                         | July | 1.88  | 19 | 90.1  | 0.90 | 1.86 |
|   |   |                         | Aug  | 1.88  | 27 | 102.7 | 1.02 | 1.56 |
|   | m | total bees              | year | 1.87  | 54 | 77.5  | 0.78 | 7.54 |
|   |   | <i>Apis mellifera</i>   | year | 1.85  | 27 | 85.8  | 0.85 | 2.70 |
|   |   |                         | June | 1.16  | 11 | 76.8  | 0.77 | 1.76 |
|   |   |                         | July | 1.51  | 10 | 108.7 | 1.09 | 2.96 |
|   |   |                         | Aug  | 1.11  | 15 | 70.4  | 0.71 | 1.59 |

|      |   |                        |      |      |    |      |      |        |
|------|---|------------------------|------|------|----|------|------|--------|
|      |   | bumble bees            | year | 1.52 | 53 | 77.2 | 0.77 | 5.77   |
|      |   | long-tongued bees      | year | 1.34 | 35 | 76.8 | 0.77 | 2.00   |
|      | s | total bees             | year | 1.84 | 67 | 69.3 | 0.69 | 13.74  |
|      |   | <i>Apis mellifera</i>  | year | 1.21 | 50 | 88.4 | 0.89 | 3.45   |
|      |   | bumble bees            | year | 1.43 | 67 | 70.4 | 0.71 | 9.57   |
|      |   | long-tongued bees      | year | 2.16 | 50 | 71.0 | 0.71 | 2.36   |
| 8    | b | total Gastropods       | year | 1.22 | 64 | 66.7 | 0.66 | 55.68  |
|      |   | slugs                  | year | 1.42 | 61 | 65.3 | 0.65 | 8.93   |
|      |   | snails                 | year | 1.36 | 61 | 77.4 | 0.78 | 36.53  |
|      | m | total Gastropods       | year | 1.51 | 58 | 47.0 | 0.47 | 84.39  |
|      |   | slugs                  | year | 1.34 | 54 | 58.7 | 0.59 | 9.78   |
|      |   | snails                 | year | 1.32 | 58 | 67.3 | 0.67 | 51.10  |
|      | s | total Gastropods       | year | 1.45 | 66 | 64.5 | 0.65 | 81.11  |
|      |   | slugs                  | year | 1.79 | 58 | 76.5 | 0.77 | 11.99  |
|      |   | snails                 | year | 1.61 | 60 | 73.1 | 0.73 | 57.62  |
| 9(a) | b | total Carabidae        | year | 1.36 | 60 | 58.1 | 0.58 | 3.93   |
|      |   | total Araneae          | year | 1.54 | 64 | 58.0 | 0.57 | 16.83  |
|      |   | total Heteroptera      | year | 2.21 | 58 | 78.8 | 0.79 | 9.59   |
|      |   | herbivorous species    | year | 1.74 | 40 | 89.0 | 0.89 | 1.67   |
|      |   |                        | June | 1.15 | 12 | 72.2 | 0.72 | 1.27   |
|      |   |                        | Aug  | 2.37 | 34 | 88.9 | 0.89 | 1.44   |
|      |   | total Collembola       | year | 1.90 | 64 | 86.5 | 0.86 | 119.04 |
|      | m | total Carabidae        | year | 2.25 | 51 | 58.2 | 0.58 | 3.56   |
|      |   | <i>B. lampros</i>      | year | 1.45 | 22 | 64.3 | 0.64 | 1.36   |
|      |   | <i>D. atricapillus</i> | year | 0.55 | 9  | 36.1 | 0.36 | 1.70   |
|      |   | total Araneae          | year | 1.56 | 57 | 46.6 | 0.47 | 22.29  |
|      |   | Linyphiidae            | year | 1.59 | 55 | 55.1 | 0.56 | 6.86   |
|      |   | total Heteroptera      | year | 2.06 | 54 | 58.9 | 0.59 | 12.39  |
|      |   | total Collembola       | year | 1.72 | 57 | 65.8 | 0.65 | 160.95 |
|      |   |                        | June | 1.66 | 52 | 76.1 | 0.76 | 69.57  |

|         |   |                   |                          |      |      |       |      |        |         |
|---------|---|-------------------|--------------------------|------|------|-------|------|--------|---------|
|         |   |                   | Aug                      | 1.54 | 53   | 75.8  | 0.76 | 86.50  |         |
|         | s | total Carabidae   | year                     | 1.24 | 58   | 61.4  | 0.61 | 2.99   |         |
|         |   | total Araneae     | year                     | 1.53 | 65   | 64.6  | 0.64 | 13.74  |         |
|         |   | Linyphiidae       | year                     | 1.44 | 60   | 58.2  | 0.58 | 5.80   |         |
|         |   |                   | June                     | 1.18 | 41   | 69.8  | 0.70 | 2.44   |         |
|         |   |                   | Aug                      | 2.81 | 53   | 66.1  | 0.66 | 4.26   |         |
|         |   | total Heteroptera | year                     | 1.06 | 47   | 56.4  | 0.57 | 7.10   |         |
|         |   | total Collembola  | year                     | 1.79 | 65   | 69.6  | 0.70 | 109.21 |         |
|         |   | Sminthuridae      | year                     | 2.24 | 54   | 127.4 | 1.27 | 10.34  |         |
|         |   |                   | June                     | 2.18 | 45   | 150.1 | 1.50 | 10.11  |         |
|         |   |                   | Aug                      | 1.57 | 36   | 92.7  | 0.93 | 3.20   |         |
| 9(b)    | b | herbivores        | year                     | 1.59 | 64   | 70.2  | 0.70 | 46.35  |         |
|         |   |                   | June                     | 1.67 | 56   | 80.8  | 0.80 | 18.07  |         |
|         |   |                   | Aug                      | 1.23 | 62   | 78.9  | 0.79 | 25.71  |         |
|         |   | predators         | year                     | 1.50 | 64   | 47.0  | 0.47 | 26.34  |         |
|         |   | parasitoids       | year                     | 1.27 | 64   | 65.9  | 0.66 | 34.09  |         |
|         |   |                   | June                     | 1.31 | 56   | 69.4  | 0.69 | 10.52  |         |
|         |   |                   | Aug                      | 1.19 | 62   | 73.9  | 0.74 | 22.71  |         |
|         | m | bird food         | year                     | 1.96 | 64   | 60.1  | 0.60 | 54.67  |         |
|         |   | herbivores        | year                     | 2.37 | 57   | 55.7  | 0.55 | 65.66  |         |
|         |   | predators         | year                     | 1.37 | 57   | 39.3  | 0.39 | 32.85  |         |
|         |   | parasitoids       | year                     | 1.75 | 57   | 47.3  | 0.47 | 41.45  |         |
|         |   | bird food         | year                     | 2.76 | 57   | 47.2  | 0.47 | 79.75  |         |
|         | s | herbivores        | year                     | 1.61 | 65   | 53.2  | 0.54 | 39.42  |         |
|         |   | predators         | year                     | 1.52 | 65   | 52.2  | 0.53 | 20.13  |         |
|         |   | parasitoids       | year                     | 2.34 | 65   | 43.3  | 0.43 | 41.47  |         |
|         |   | bird food         | year                     | 1.52 | 65   | 40.6  | 0.41 | 48.95  |         |
| surface | 1 | b                 | total Carabidae          | year | 1.13 | 66    | 24.5 | 0.25   | 1640.78 |
|         |   |                   | <i>Pterostichus</i> spp. | year | 1.39 | 66    | 26.9 | 0.26   | 1217.39 |
|         |   |                   | <i>Bembidion</i> spp.    | year | 1.59 | 61    | 61.9 | 0.62   | 35.67   |

|   |                          |      |      |    |      |      |        |
|---|--------------------------|------|------|----|------|------|--------|
|   |                          | May  | 1.43 | 51 | 64.8 | 0.65 | 34.06  |
|   |                          | July | 1.84 | 43 | 76.0 | 0.76 | 8.88   |
|   |                          | Aug  | 1.74 | 40 | 82.7 | 0.82 | 4.41   |
|   | <i>B. tetracolum</i>     | year | 1.59 | 41 | 80.8 | 0.80 | 12.97  |
|   |                          | May  | 1.65 | 31 | 78.5 | 0.79 | 13.61  |
|   |                          | July | 1.86 | 25 | 85.2 | 0.85 | 6.42   |
|   |                          | Aug  | 2.07 | 13 | 47.7 | 0.48 | 3.83   |
|   | <i>N. brevicollis</i>    | year | 1.74 | 45 | 58.0 | 0.58 | 19.27  |
|   | <i>H. rufipes</i>        | year | 1.51 | 64 | 62.7 | 0.63 | 37.86  |
|   |                          | May  | 1.78 | 30 | 60.4 | 0.61 | 4.00   |
|   |                          | July | 1.62 | 53 | 66.2 | 0.66 | 12.99  |
|   |                          | Aug  | 1.48 | 58 | 74.2 | 0.74 | 33.20  |
|   | <i>Amara</i> spp.        | year | 1.30 | 43 | 69.0 | 0.69 | 2.89   |
|   |                          | May  | 1.52 | 25 | 74.3 | 0.74 | 2.07   |
|   |                          | July | 1.19 | 16 | 59.3 | 0.59 | 2.04   |
|   |                          | Aug  | 1.80 | 24 | 64.5 | 0.65 | 1.60   |
|   | <i>L. pilicornis</i>     | year | 1.97 | 38 | 61.6 | 0.61 | 2.96   |
|   | <i>T. quadristriatus</i> | year | 1.75 | 65 | 66.2 | 0.66 | 11.52  |
|   |                          | May  | 3.29 | 32 | 71.1 | 0.71 | 3.41   |
|   |                          | July | 1.93 | 30 | 69.6 | 0.70 | 3.75   |
|   |                          | Aug  | 1.88 | 58 | 73.4 | 0.73 | 9.10   |
| m | total Carabidae          | year | 2.20 | 58 | 28.3 | 0.29 | 805.61 |
|   | <i>Pterostichus</i> spp. | year | 1.97 | 58 | 30.9 | 0.31 | 477.68 |
|   |                          | May  | 1.75 | 54 | 48.2 | 0.48 | 49.13  |
|   |                          | July | 1.82 | 49 | 41.4 | 0.41 | 251.05 |
|   |                          | Aug  | 2.35 | 45 | 31.1 | 0.31 | 367.13 |
|   | <i>P. niger</i>          | year | 2.45 | 38 | 68.8 | 0.69 | 14.03  |
|   | <i>Bembidion</i> spp.    | year | 1.70 | 58 | 54.5 | 0.55 | 45.68  |
|   | <i>N. brevicollis</i>    | year | 1.92 | 43 | 70.4 | 0.70 | 9.47   |
|   | <i>H. rufipes</i>        | year | 1.58 | 53 | 81.2 | 0.82 | 18.11  |

|   |   |                          |      |      |    |      |      |         |
|---|---|--------------------------|------|------|----|------|------|---------|
|   |   |                          | May  | 1.48 | 34 | 52.9 | 0.53 | 4.11    |
|   |   |                          | July | 1.61 | 40 | 78.1 | 0.78 | 8.92    |
|   |   |                          | Aug  | 1.66 | 41 | 92.1 | 0.92 | 14.77   |
|   |   | <i>Amara</i> spp.        | year | 2.01 | 42 | 64.5 | 0.64 | 2.63    |
|   |   |                          | May  | 0.68 | 25 | 53.3 | 0.53 | 2.41    |
|   |   |                          | July | 1.37 | 16 | 74.5 | 0.74 | 1.30    |
|   |   |                          | Aug  | 0.88 | 20 | 75.5 | 0.76 | 1.29    |
|   |   | <i>A. dorsale</i>        | year | 1.19 | 45 | 80.1 | 0.80 | 7.16    |
|   |   |                          | May  | 1.27 | 34 | 79.4 | 0.80 | 3.77    |
|   |   |                          | July | 1.96 | 34 | 98.9 | 0.99 | 4.27    |
|   |   |                          | Aug  | 1.63 | 17 | 67.0 | 0.67 | 3.22    |
|   |   | <i>L. pilicornis</i>     | year | 1.27 | 43 | 61.5 | 0.62 | 4.23    |
|   |   | <i>T. quadristriatus</i> | year | 1.48 | 48 | 66.2 | 0.67 | 8.41    |
| s |   | total Carabidae          | year | 1.57 | 67 | 23.9 | 0.24 | 1036.28 |
|   |   | <i>Pterostichus</i> spp. | year | 1.33 | 67 | 33.6 | 0.33 | 677.95  |
|   |   | <i>P. niger</i>          | year | 1.49 | 60 | 48.8 | 0.49 | 55.95   |
|   |   | <i>Bembidion</i> spp.    | year | 1.27 | 64 | 57.7 | 0.57 | 19.57   |
|   |   | <i>N. brevicollis</i>    | year | 1.72 | 58 | 70.0 | 0.69 | 25.62   |
|   |   | <i>H. rufipes</i>        | year | 1.84 | 53 | 83.6 | 0.84 | 22.27   |
|   |   |                          | May  | 1.24 | 24 | 72.2 | 0.73 | 2.76    |
|   |   |                          | July | 1.82 | 42 | 78.6 | 0.78 | 7.06    |
|   |   |                          | Aug  | 1.91 | 49 | 89.1 | 0.89 | 18.24   |
|   |   | <i>Amara</i> spp.        | year | 1.53 | 49 | 63.8 | 0.64 | 5.16    |
|   |   | <i>L. pilicornis</i>     | year | 1.21 | 58 | 60.1 | 0.60 | 4.03    |
|   |   | <i>T. quadristriatus</i> | year | 1.54 | 56 | 62.8 | 0.63 | 7.78    |
|   |   | <i>N. biguttatus</i>     | year | 1.25 | 53 | 62.2 | 0.62 | 7.86    |
| 2 | b | Staphylinidae            | year | 1.35 | 66 | 37.0 | 0.37 | 134.52  |
|   | m | Staphylinidae            | year | 1.26 | 58 | 39.8 | 0.40 | 128.76  |
|   | s | Staphylinidae            | year | 1.03 | 67 | 32.1 | 0.32 | 214.84  |
| 3 | b | total spiders            | year | 1.76 | 66 | 30.3 | 0.30 | 284.01  |

|   |   |                        |      |      |    |      |      |        |
|---|---|------------------------|------|------|----|------|------|--------|
|   |   | Linyphiidae            | year | 1.80 | 66 | 33.7 | 0.33 | 139.88 |
|   |   |                        | year |      |    |      |      |        |
|   |   | <i>L. tenuis</i>       |      | 1.07 | 63 | 48.7 | 0.49 | 14.35  |
|   |   | <i>Erigone</i> agg.    | year | 1.58 | 62 | 65.2 | 0.65 | 39.18  |
|   |   | <i>Oedothorax</i> spp. | year | 1.43 | 42 | 46.4 | 0.46 | 64.03  |
|   |   | Lycosidae              | year | 1.57 | 63 | 41.6 | 0.41 | 26.84  |
|   |   | <i>Pardosa</i> spp.    | year | 1.48 | 61 | 62.4 | 0.62 | 8.85   |
|   | m | total spiders          | year | 1.55 | 58 | 30.5 | 0.31 | 251.66 |
|   |   | Linyphiidae            | year | 2.29 | 58 | 38.7 | 0.38 | 128.39 |
|   |   |                        | year |      |    |      |      |        |
|   |   | <i>L. tenuis</i>       |      | 0.93 | 56 | 45.3 | 0.45 | 15.69  |
|   |   | <i>Erigone</i> agg.    | year | 1.75 | 57 | 66.5 | 0.66 | 41.98  |
|   |   | <i>Oedothorax</i> spp. | year | 1.41 | 46 | 70.6 | 0.71 | 50.70  |
|   |   | Lycosidae              | year | 1.53 | 58 | 35.6 | 0.36 | 27.60  |
|   |   | <i>Pardosa</i> spp.    | year | 1.77 | 55 | 56.2 | 0.57 | 9.84   |
|   | s | total spiders          | year | 1.86 | 67 | 29.5 | 0.29 | 213.18 |
|   |   | Linyphiidae            | year | 1.50 | 67 | 28.7 | 0.29 | 125.24 |
|   |   |                        | year |      |    |      |      |        |
|   |   | <i>L. tenuis</i>       |      | 0.99 | 66 | 39.8 | 0.40 | 22.12  |
|   |   | <i>Erigone</i> agg.    | year | 1.64 | 67 | 57.7 | 0.57 | 30.31  |
|   |   | <i>Oedothorax</i> spp. | year | 1.70 | 54 | 58.3 | 0.59 | 26.37  |
|   |   | Lycosidae              | year | 1.48 | 67 | 35.8 | 0.36 | 34.30  |
|   |   | <i>Pardosa</i> spp.    | year | 1.80 | 59 | 58.1 | 0.58 | 10.17  |
| 4 | b | total Collembola       | year | 2.06 | 66 | 49.3 | 0.49 | 377.77 |
|   |   |                        | May  | 1.71 | 53 | 56.1 | 0.56 | 195.38 |
|   |   |                        | July | 1.89 | 60 | 88.7 | 0.88 | 79.26  |
|   |   |                        | Aug  | 1.57 | 62 | 75.8 | 0.76 | 69.27  |
|   |   | Entomobryidae          | year | 1.37 | 66 | 72.5 | 0.73 | 96.14  |
|   |   |                        | May  | 1.72 | 52 | 78.8 | 0.79 | 53.09  |

|   |                  |      |       |    |       |      |        |
|---|------------------|------|-------|----|-------|------|--------|
|   |                  | July | 1.68  | 53 | 96.7  | 0.97 | 25.01  |
|   |                  | Aug  | 1.50  | 59 | 79.3  | 0.79 | 35.53  |
|   | Isotomidae       | year | 2.23  | 65 | 67.1  | 0.67 | 86.26  |
|   |                  | May  | 1.73  | 53 | 74.9  | 0.75 | 52.33  |
|   |                  | July | 2.22  | 56 | 92.7  | 0.93 | 16.57  |
|   |                  | Aug  | 2.03  | 48 | 92.8  | 0.92 | 15.38  |
|   | Sminthuridae     | year | 2.00  | 58 | 78.4  | 0.78 | 43.95  |
|   |                  | May  | 2.09  | 40 | 87.8  | 0.88 | 23.43  |
|   |                  | July | 1.99  | 53 | 103.1 | 1.03 | 14.19  |
|   |                  | Aug  | 2.01  | 40 | 98.9  | 0.99 | 10.18  |
|   | Poduridae        | year | 1.68  | 29 | 86.4  | 0.87 | 18.28  |
|   |                  | May  | 1.64  | 22 | 82.6  | 0.82 | 15.88  |
|   |                  | July | 66.42 | 17 | 120.0 | 1.20 | 4.86   |
|   |                  | Aug  | 2.12  | 17 | 133.5 | 1.34 | 6.10   |
| m | total Collembola | year | 1.86  | 58 | 54.0  | 0.55 | 666.54 |
|   |                  | May  | 1.58  | 54 | 66.6  | 0.67 | 317.21 |
|   |                  | July | 1.88  | 49 | 71.0  | 0.71 | 194.99 |
|   |                  | Aug  | 2.20  | 45 | 85.8  | 0.86 | 109.09 |
|   | Entomobryidae    | year | 1.68  | 58 | 58.5  | 0.58 | 177.93 |
|   |                  | May  | 1.60  | 52 | 82.8  | 0.83 | 74.36  |
|   |                  | July | 1.73  | 45 | 69.0  | 0.69 | 55.02  |
|   |                  | Aug  | 1.77  | 44 | 82.6  | 0.82 | 45.73  |
|   | Isotomidae       | year | 1.96  | 58 | 62.9  | 0.63 | 166.67 |
|   |                  | May  | 1.68  | 53 | 72.2  | 0.72 | 109.59 |
|   |                  | July | 1.88  | 47 | 81.2  | 0.81 | 38.95  |
|   |                  | Aug  | 1.87  | 43 | 98.7  | 0.98 | 15.75  |
|   | Sminthuridae     | year | 1.96  | 58 | 84.6  | 0.84 | 68.10  |
|   |                  | May  | 2.10  | 52 | 90.5  | 0.90 | 39.27  |
|   |                  | July | 1.81  | 45 | 111.1 | 1.11 | 27.40  |
|   |                  | Aug  | 1.92  | 39 | 117.1 | 1.17 | 9.04   |



|   |   |                       |      |      |    |       |      |        |
|---|---|-----------------------|------|------|----|-------|------|--------|
|   |   | Poduridae             | year | 1.87 | 42 | 138.5 | 1.38 | 11.50  |
|   |   |                       | May  | 2.15 | 31 | 117.6 | 1.18 | 4.90   |
|   |   |                       | July | 2.05 | 25 | 193.7 | 1.94 | 7.95   |
|   |   |                       | Aug  | 2.87 | 16 | 156.6 | 1.56 | 13.78  |
|   | s | total Collembola      | year | 1.38 | 67 | 43.8  | 0.44 | 554.67 |
|   |   |                       | May  | 1.87 | 57 | 51.5  | 0.52 | 179.93 |
|   |   |                       | July | 1.60 | 57 | 70.3  | 0.70 | 116.47 |
|   |   |                       | Aug  | 1.46 | 60 | 51.9  | 0.52 | 186.37 |
|   |   | Entomobryidae         | year | 1.50 | 67 | 72.8  | 0.73 | 105.82 |
|   |   |                       | May  | 1.74 | 53 | 79.6  | 0.79 | 40.53  |
|   |   |                       | July | 1.50 | 53 | 104.1 | 1.04 | 27.99  |
|   |   |                       | Aug  | 1.56 | 55 | 79.4  | 0.80 | 52.83  |
|   |   | Isotomidae            | year | 1.50 | 67 | 46.0  | 0.47 | 213.10 |
|   |   |                       | May  | 1.83 | 57 | 60.0  | 0.60 | 81.23  |
|   |   |                       | July | 1.75 | 53 | 79.3  | 0.79 | 35.74  |
|   |   |                       | Aug  | 1.64 | 57 | 67.2  | 0.68 | 69.93  |
|   |   | Sminthuridae          | year | 1.33 | 66 | 99.0  | 0.99 | 70.52  |
|   |   |                       | May  | 1.38 | 49 | 90.7  | 0.91 | 31.09  |
|   |   |                       | July | 1.66 | 54 | 124.6 | 1.24 | 25.12  |
|   |   |                       | Aug  | 1.54 | 49 | 76.7  | 0.76 | 18.06  |
|   |   | Poduridae             | year | 1.65 | 46 | 110.9 | 1.10 | 6.73   |
|   |   |                       | May  | 1.90 | 27 | 106.3 | 1.07 | 4.15   |
|   |   |                       | July | 2.65 | 23 | 113.7 | 1.14 | 3.20   |
|   |   |                       | Aug  | 1.91 | 27 | 98.3  | 0.98 | 4.56   |
| 6 | b | total gastropods      | year | 2.56 | 40 | 70.4  | 0.70 | 4.96   |
|   |   | <i>D. reticulatum</i> | year | 1.43 | 34 | 79.5  | 0.80 | 3.85   |
|   | m | total gastropods      | year | 1.46 | 42 | 71.0  | 0.71 | 8.35   |
|   |   | <i>D. reticulatum</i> | year | 1.85 | 36 | 71.8  | 0.72 | 5.80   |
|   | s | total gastropods      | year | 1.56 | 59 | 67.5  | 0.68 | 11.27  |

|         |   |   |                       |                |      |      |       |       |        |        |
|---------|---|---|-----------------------|----------------|------|------|-------|-------|--------|--------|
| trophic | 4 | b | <i>D. reticulatum</i> | year           | 1.56 | 47   | 83.1  | 0.83  | 8.51   |        |
|         |   |   |                       | May            | 1.50 | 33   | 94.2  | 0.94  | 2.92   |        |
|         |   |   |                       | Aug            | 1.61 | 36   | 93.7  | 0.94  | 7.02   |        |
|         |   |   | herbivores            | year           | 2.05 | 52   | 64.9  | 0.65  | 132.47 |        |
|         |   |   | aphids                |                | 1.71 | 50   | 86.7  | 0.86  | 112.81 |        |
|         |   |   | flea beetles          |                | 2.21 | 40   | 84.6  | 0.84  | 2.95   |        |
|         |   |   | leaf miners           |                | 2.34 | 10   | 68.5  | 0.68  | 3.85   |        |
|         |   |   | predators             |                | 1.69 | 52   | 54.1  | 0.54  | 22.80  |        |
|         |   |   | parasitoids           |                | 1.59 | 44   | 89.7  | 0.90  | 6.38   |        |
|         |   |   | herbivores            | June           | 2.28 | 40   | 72.3  | 0.72  | 15.09  |        |
|         |   |   |                       | July           | 1.80 | 52   | 76.2  | 0.76  | 107.70 |        |
|         |   |   | predators             | June           | 1.78 | 33   | 53.4  | 0.53  | 7.69   |        |
|         |   |   |                       | July           | 2.23 | 50   | 64.6  | 0.64  | 16.92  |        |
|         |   |   | parasitoids           | June           | 1.22 | 22   | 56.1  | 0.56  | 3.15   |        |
|         |   |   |                       | July           | 1.93 | 41   | 100.9 | 1.01  | 4.99   |        |
|         |   | m | herbivores            | year           | 1.48 | 54   | 43.5  | 0.43  | 325.31 |        |
|         |   |   | aphids                |                | 1.52 | 54   | 83.7  | 0.84  | 62.75  |        |
|         |   |   | thrips                |                | 1.29 | 54   | 47.4  | 0.48  | 163.81 |        |
|         |   |   | predators             |                | 2.05 | 54   | 59.1  | 0.59  | 29.85  |        |
|         |   |   | parasitoids           |                | 1.74 | 49   | 85.2  | 0.85  | 12.87  |        |
|         |   |   | herbivores            | July           | 1.16 | 47   | 50.6  | 0.50  | 176.95 |        |
|         |   |   |                       | Aug            | 1.70 | 52   | 90.7  | 0.90  | 103.94 |        |
|         |   |   | predators             | July           | 1.88 | 45   | 68.7  | 0.69  | 8.09   |        |
|         |   |   |                       | Aug            | 1.78 | 52   | 63.0  | 0.63  | 19.86  |        |
|         |   |   | parasitoids           | July           | 1.67 | 37   | 88.9  | 0.89  | 4.95   |        |
|         |   |   |                       | Aug            | 1.76 | 44   | 84.7  | 0.84  | 8.86   |        |
|         |   |   | s                     | herbivores     | year | 1.81 | 64    | 54.6  | 0.55   | 211.69 |
|         |   |   |                       | aphids         |      | 1.84 | 49    | 101.9 | 1.01   | 25.38  |
|         |   |   |                       | pollen beetles |      | 1.66 | 62    | 61.0  | 0.62   | 127.39 |
|         |   |   |                       | predators      |      | 1.37 | 55    | 79.8  | 0.80   | 6.05   |

|   |   |              |      |      |    |      |      |        |
|---|---|--------------|------|------|----|------|------|--------|
|   |   | parasitoids  |      | 1.24 | 40 | 97.1 | 0.97 | 4.17   |
|   |   | herbivores   | June | 1.58 | 52 | 70.3 | 0.70 | 33.32  |
|   |   |              | July | 1.81 | 63 | 66.2 | 0.66 | 166.48 |
|   |   | predators    | June | 2.06 | 27 | 78.6 | 0.79 | 4.14   |
|   |   |              | July | 2.04 | 47 | 78.5 | 0.78 | 5.00   |
|   |   | parasitoids  | June | 1.67 | 20 | 94.6 | 0.95 | 2.97   |
|   |   |              | July | 1.43 | 31 | 88.3 | 0.88 | 3.91   |
| 5 | b | herbivores   | year | 1.64 | 64 | 66.0 | 0.66 | 14.52  |
|   |   | predators    | year | 1.26 | 64 | 45.1 | 0.46 | 15.32  |
|   |   | parasitoids  | year | 1.81 | 64 | 54.2 | 0.55 | 21.76  |
|   |   | detritivores | year | 2.45 | 64 | 61.6 | 0.61 | 62.76  |
|   |   | herbivores   | June | 1.61 | 57 | 80.4 | 0.80 | 24.51  |
|   |   |              | Aug  | 1.96 | 61 | 54.8 | 0.55 | 39.21  |
|   |   | predators    | June | 1.30 | 56 | 51.8 | 0.51 | 12.23  |
|   |   |              | Aug  | 2.21 | 61 | 42.1 | 0.42 | 32.45  |
|   |   | parasitoids  | June | 1.37 | 56 | 63.0 | 0.63 | 14.00  |
|   |   |              | Aug  | 1.65 | 61 | 48.5 | 0.48 | 46.10  |
|   |   | detritivores | June | 1.59 | 57 | 84.9 | 0.85 | 60.61  |
|   |   |              | Aug  | 2.09 | 61 | 75.8 | 0.76 | 123.68 |
|   | m | herbivores   | year | 1.82 | 56 | 77.8 | 0.78 | 13.26  |
|   |   | predators    | year | 2.67 | 56 | 53.7 | 0.54 | 11.21  |
|   |   | parasitoids  | year | 1.82 | 57 | 63.3 | 0.64 | 15.13  |
|   |   | detritivores | year | 1.64 | 57 | 76.9 | 0.77 | 95.00  |
|   |   | herbivores   | June | 1.71 | 44 | 87.8 | 0.87 | 6.19   |
|   |   |              | Aug  | 3.03 | 52 | 80.5 | 0.81 | 7.38   |
|   |   | predators    | June | 1.32 | 41 | 57.6 | 0.57 | 2.74   |
|   |   |              | Aug  | 1.84 | 52 | 62.3 | 0.62 | 9.72   |
|   |   | parasitoids  | June | 1.88 | 42 | 64.7 | 0.64 | 2.72   |
|   |   |              | Aug  | 1.76 | 53 | 70.9 | 0.71 | 14.13  |
|   |   | detritivores | June | 2.07 | 52 | 89.9 | 0.90 | 33.17  |

|   |   |              |      |      |    |      |      |         |
|---|---|--------------|------|------|----|------|------|---------|
|   |   |              | Aug  | 1.38 | 53 | 90.5 | 0.90 | 50.87   |
|   | s | herbivores   | year | 2.07 | 65 | 64.2 | 0.64 | 18.60   |
|   |   | predators    | year | 2.08 | 65 | 44.4 | 0.45 | 12.97   |
|   |   | parasitoids  | year | 1.02 | 64 | 45.4 | 0.46 | 49.31   |
|   |   | detritivores | year | 2.09 | 64 | 65.8 | 0.66 | 121.52  |
|   |   | herbivores   | June | 1.77 | 53 | 76.9 | 0.77 | 9.35    |
|   |   |              | Aug  | 2.38 | 62 | 63.1 | 0.63 | 9.08    |
|   |   | predators    | June | 1.89 | 53 | 59.8 | 0.59 | 3.11    |
|   |   |              | Aug  | 1.66 | 62 | 55.3 | 0.55 | 10.28   |
|   |   | parasitoids  | June | 1.81 | 48 | 65.7 | 0.65 | 8.89    |
|   |   |              | Aug  | 1.32 | 61 | 48.1 | 0.48 | 42.15   |
|   |   | detritivores | June | 2.00 | 54 | 88.4 | 0.89 | 32.89   |
|   |   |              | Aug  | 2.12 | 60 | 53.6 | 0.53 | 86.93   |
| 6 | b | detritivores | year | 2.06 | 66 | 49.3 | 0.49 | 377.77  |
|   |   | predators    |      | 1.03 | 66 | 20.7 | 0.21 | 2252.63 |
|   |   | detritivores | May  | 1.71 | 53 | 56.1 | 0.56 | 195.38  |
|   |   |              | June | 1.89 | 60 | 88.7 | 0.88 | 79.26   |
|   |   |              | Aug  | 1.57 | 62 | 75.8 | 0.76 | 69.27   |
|   |   | predators    | May  | 1.21 | 53 | 28.2 | 0.28 | 317.06  |
|   |   |              | June | 1.34 | 61 | 26.1 | 0.27 | 1019.15 |
|   |   |              | Aug  | 1.82 | 62 | 29.1 | 0.29 | 940.13  |
|   | m | detritivores | year | 1.86 | 58 | 54.0 | 0.55 | 666.54  |
|   |   | predators    |      | 2.05 | 58 | 22.0 | 0.22 | 1355.17 |
|   |   | detritivores | May  | 1.58 | 54 | 66.6 | 0.67 | 317.21  |
|   |   |              | June | 1.88 | 49 | 71.0 | 0.71 | 194.99  |
|   |   |              | Aug  | 2.20 | 45 | 85.8 | 0.86 | 109.09  |
|   |   | predators    | May  | 1.35 | 54 | 26.4 | 0.26 | 357.86  |
|   |   |              | June | 2.38 | 49 | 27.9 | 0.27 | 684.49  |
|   |   |              | Aug  | 1.88 | 45 | 26.9 | 0.27 | 679.30  |
|   | s | detritivores | year | 1.38 | 67 | 43.8 | 0.44 | 554.67  |

|            |   |   |                  |      |      |    |       |      |         |
|------------|---|---|------------------|------|------|----|-------|------|---------|
|            |   |   | predators        |      | 1.75 | 67 | 16.4  | 0.16 | 1641.28 |
|            |   |   | detritivores     | May  | 1.87 | 57 | 51.5  | 0.52 | 179.93  |
|            |   |   |                  | June | 1.60 | 57 | 70.3  | 0.70 | 116.47  |
|            |   |   |                  | Aug  | 1.46 | 60 | 51.9  | 0.52 | 186.37  |
|            |   |   | predators        | May  | 1.64 | 57 | 35.6  | 0.36 | 295.08  |
|            |   |   |                  | June | 1.94 | 63 | 25.2  | 0.25 | 504.57  |
|            |   |   |                  | Aug  | 2.18 | 60 | 24.6  | 0.25 | 914.69  |
|            | 7 | b | pollinators      | year | 1.30 | 60 | 60.6  | 0.61 | 5.43    |
|            |   |   |                  | May  | 0.61 | 7  | 58.6  | 0.59 | 1.32    |
|            |   |   |                  | June | 2.62 | 13 | 66.4  | 0.66 | 1.97    |
|            |   |   |                  | July | 0.68 | 36 | 59.7  | 0.60 | 2.40    |
|            |   |   |                  | Aug  | 1.47 | 51 | 70.0  | 0.70 | 3.49    |
|            |   | m | pollinators      | year | 2.23 | 42 | 75.8  | 0.76 | 3.55    |
|            |   |   |                  | June | 1.38 | 6  | 58.9  | 0.59 | 1.18    |
|            |   |   |                  | July | 1.32 | 20 | 81.5  | 0.82 | 2.50    |
|            |   |   |                  | Aug  | 1.61 | 31 | 74.0  | 0.74 | 2.78    |
|            |   | s | pollinators      | year | 1.49 | 66 | 44.2  | 0.44 | 58.99   |
|            |   |   |                  | June | 1.50 | 41 | 80.0  | 0.80 | 6.76    |
|            |   |   |                  | July | 1.46 | 61 | 74.6  | 0.75 | 27.11   |
|            |   |   |                  | Aug  | 1.01 | 55 | 56.6  | 0.57 | 13.78   |
| vegetation | 2 | b | seedbank         | -    | 1.92 | 64 | 44.8  | 0.44 | 100.51  |
|            |   |   | seedling         | -    | 2.08 | 64 | 62.4  | 0.63 | 370.29  |
|            |   |   | pre-GM herbicide | -    | 1.69 | 54 | 94.7  | 0.95 | 411.95  |
|            |   |   | post-herbicide   | -    | 1.46 | 62 | 67.8  | 0.68 | 250.26  |
|            |   |   | final            | -    | 1.92 | 63 | 60.7  | 0.61 | 86.68   |
|            |   |   | seed rain        | -    | 1.95 | 65 | 144.5 | 1.44 | 85.93   |
|            |   | m | seedbank         | -    | 1.65 | 57 | 36.7  | 0.37 | 127.42  |
|            |   |   | seedling         | -    | 1.61 | 58 | 103.2 | 1.03 | 440.27  |
|            |   |   | post-herbicide   | -    | 1.61 | 52 | 115.8 | 1.16 | 185.64  |
|            |   |   | final            | -    | 1.75 | 45 | 78.3  | 0.79 | 83.15   |

|   |                |                  |      |      |       |       |        |        |
|---|----------------|------------------|------|------|-------|-------|--------|--------|
| 4 | s              | seed rain        | -    | 2.40 | 54    | 180.2 | 1.81   | 139.12 |
|   |                | seedbank         | -    | 1.73 | 65    | 71.4  | 0.71   | 109.74 |
|   |                | seedling         | -    | 1.56 | 66    | 94.9  | 0.95   | 287.70 |
|   |                | post-herbicide   | -    | 1.75 | 62    | 74.5  | 0.74   | 293.01 |
|   |                | final            | -    | 1.64 | 63    | 64.2  | 0.65   | 203.28 |
|   | b              | seed rain        | -    | 2.16 | 65    | 132.5 | 1.33   | 346.01 |
|   |                | seedbank         | -    | 2.11 | 64    | 47.7  | 0.48   | 48.70  |
|   |                | seedling         | -    | 2.02 | 64    | 64.6  | 0.65   | 261.52 |
|   |                | pre-GM herbicide | -    | 1.69 | 54    | 83.4  | 0.84   | 254.95 |
|   |                | post-herbicide   | -    | 1.43 | 62    | 65.1  | 0.65   | 165.25 |
|   | m              | final            | -    | 1.81 | 63    | 57.7  | 0.58   | 53.13  |
|   |                | seed rain        | -    | 1.95 | 65    | 149.1 | 1.50   | 71.32  |
|   |                | seedbank         | -    | 1.74 | 57    | 46.6  | 0.47   | 67.88  |
|   |                | seedling         | -    | 1.64 | 58    | 126.5 | 1.26   | 302.10 |
|   |                | post-herbicide   | -    | 1.62 | 52    | 128.6 | 1.28   | 101.43 |
| s | final          | -                | 1.72 | 45   | 89.8  | 0.90  | 43.61  |        |
|   | seed rain      | -                | 2.27 | 54   | 191.8 | 1.91  | 98.46  |        |
|   | seedbank       | -                | 1.62 | 65   | 64.7  | 0.64  | 58.16  |        |
|   | seedling       | -                | 1.69 | 65   | 95.2  | 0.96  | 199.57 |        |
|   | post-herbicide | -                | 1.97 | 62   | 80.6  | 0.81  | 194.03 |        |
| 5 | b              | final            | -    | 1.95 | 63    | 71.2  | 0.71   | 115.84 |
|   |                | seed rain        | -    | 2.31 | 65    | 142.9 | 1.43   | 255.24 |
|   |                | seedbank         | -    | 1.81 | 63    | 62.1  | 0.62   | 32.90  |
|   |                | seedling         | -    | 2.15 | 64    | 95.4  | 0.95   | 45.65  |
|   |                | pre-GM herbicide | -    | 1.87 | 54    | 142.6 | 1.42   | 62.18  |
|   | m              | post-herbicide   | -    | 2.01 | 62    | 121.9 | 1.22   | 36.88  |
|   |                | final            | -    | 1.53 | 62    | 92.3  | 0.92   | 18.72  |
|   |                | seed rain        | -    | 1.96 | 53    | 135.9 | 1.36   | 9.04   |
|   |                | seedbank         | -    | 1.46 | 57    | 64.1  | 0.64   | 43.19  |
|   |                | seedling         | -    | 1.95 | 58    | 95.1  | 0.95   | 65.82  |

|   |                |   |      |    |       |      |       |
|---|----------------|---|------|----|-------|------|-------|
|   | post-herbicide | - | 1.93 | 51 | 123.6 | 1.23 | 50.62 |
|   | final          | - | 1.72 | 45 | 89.2  | 0.90 | 25.37 |
|   | seed rain      | - | 2.08 | 42 | 160.5 | 1.60 | 17.83 |
| s | seedbank       | - | 1.93 | 64 | 90.3  | 0.90 | 35.08 |
|   | seedling       | - | 1.79 | 66 | 101.0 | 1.01 | 49.27 |
|   | post-herbicide | - | 2.26 | 62 | 102.9 | 1.03 | 52.69 |
|   | final          | - | 1.62 | 63 | 89.0  | 0.89 | 48.20 |
|   | seed rain      | - | 1.85 | 60 | 137.1 | 1.37 | 29.76 |

---

Table A3. Number of analyses, out of  $N$ , with  $\geq 90\%$  power for various multiples,  $k$ , of  $n$  (number of fields, see table A2), and three values of the multiplicative treatment effect,  $R$ , for groups of indicators corresponding to the primary FSE papers (see table 1) and all 531 indicators combined.

| $k$  | $R$ | group                 |                         |                        |                        |                          |                                  |
|------|-----|-----------------------|-------------------------|------------------------|------------------------|--------------------------|----------------------------------|
|      |     | aerial<br>( $N=106$ ) | boundary<br>( $N=119$ ) | surface<br>( $N=151$ ) | trophic<br>( $N=107$ ) | vegetation<br>( $N=48$ ) | all<br>indicators<br>( $N=531$ ) |
| 0.08 | 1.3 | 4                     | 0                       | 1                      | 0                      | 0                        | 5                                |
| 0.17 |     | 2                     | 0                       | 1                      | 1                      | 0                        | 4                                |
| 0.33 |     | 2                     | 0                       | 4                      | 4                      | 0                        | 10                               |
| 0.5  |     | 2                     | 0                       | 9                      | 10                     | 0                        | 21                               |
| 0.67 |     | 0                     | 0                       | 14                     | 12                     | 0                        | 26                               |
| 1    |     | 1                     | 2                       | 22                     | 16                     | 2                        | 43                               |
| 1.5  |     | 4                     | 11                      | 31                     | 27                     | 4                        | 77                               |
| 2    |     | 8                     | 20                      | 40                     | 37                     | 11                       | 116                              |
| 3    |     | 22                    | 47                      | 66                     | 57                     | 17                       | 209                              |
| 6    |     | 53                    | 67                      | 106                    | 86                     | 32                       | 344                              |
| 12   |     | 80                    | 86                      | 132                    | 100                    | 44                       | 442                              |
| 0.08 |     | 1.5                   | 4                       | 0                      | 1                      | 1                        | 0                                |
| 0.17 | 2   |                       | 0                       | 4                      | 5                      | 0                        | 11                               |
| 0.33 | 2   |                       | 0                       | 16                     | 12                     | 0                        | 30                               |
| 0.5  | 3   |                       | 3                       | 24                     | 19                     | 2                        | 51                               |
| 0.67 | 2   |                       | 12                      | 31                     | 29                     | 4                        | 78                               |
| 1    | 13  |                       | 28                      | 48                     | 43                     | 15                       | 147                              |
| 1.5  | 26  |                       | 49                      | 72                     | 62                     | 18                       | 227                              |
| 2    | 42  |                       | 59                      | 89                     | 78                     | 26                       | 294                              |



|      |   |     |     |     |     |    |     |
|------|---|-----|-----|-----|-----|----|-----|
| 3    |   | 59  | 70  | 113 | 89  | 34 | 365 |
| 6    |   | 84  | 87  | 138 | 101 | 44 | 454 |
| 12   |   | 94  | 109 | 145 | 105 | 48 | 501 |
| 0.08 | 2 | 4   | 0   | 7   | 8   | 0  | 19  |
| 0.17 |   | 3   | 4   | 24  | 16  | 2  | 49  |
| 0.33 |   | 9   | 18  | 42  | 39  | 12 | 120 |
| 0.5  |   | 23  | 43  | 66  | 60  | 18 | 210 |
| 0.67 |   | 36  | 55  | 85  | 71  | 24 | 271 |
| 1    |   | 51  | 67  | 111 | 89  | 33 | 351 |
| 1.5  |   | 72  | 74  | 129 | 95  | 40 | 410 |
| 2    |   | 83  | 85  | 133 | 101 | 44 | 446 |
| 3    |   | 87  | 97  | 142 | 102 | 45 | 473 |
| 6    |   | 98  | 114 | 147 | 105 | 48 | 512 |
| 12   |   | 102 | 118 | 150 | 107 | 48 | 525 |

---

### Legend to Figure A1

Figure A1. Proportion of analyses with 80% power given estimated initial sample sizes ( $n$ , number of fields), for six values of the multiplicative treatment effect,  $R = 1.1$  (x), 1.2 (●), 1.3 (+), 1.4 (\*), 1.5 (■) and 2 (◆), based on analyses of 531 FSE count indicators (see table A2).

Figure A1

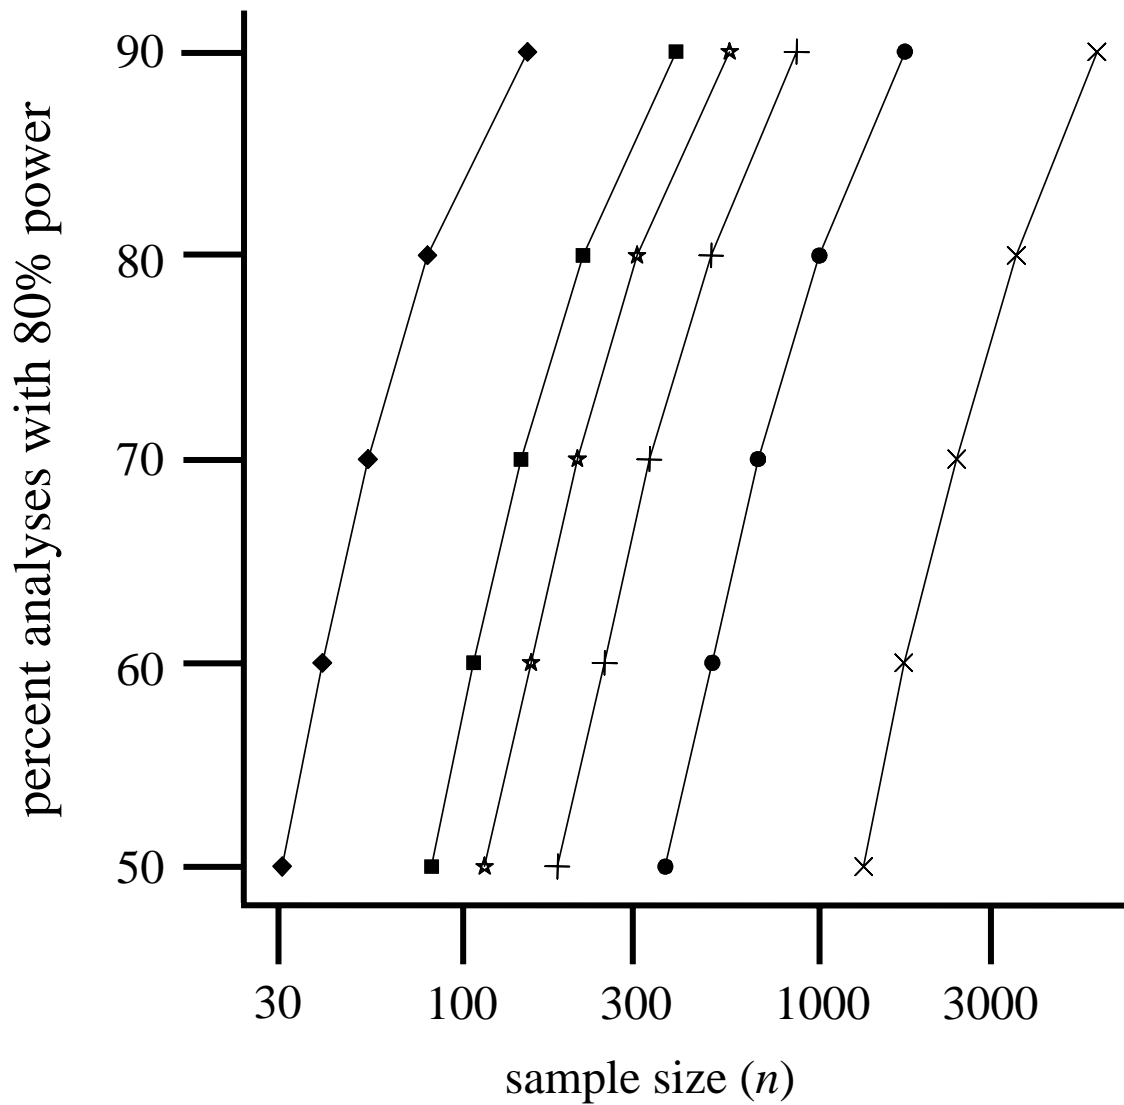

### References within Electronic Appendix

- Brooks, D.R. (and 32 others) 2003 Invertebrate responses to the management of genetically modified herbicide-tolerant and conventional spring crops. I. Soil-surface-active invertebrates. *Phil. Trans. R. Soc. Lond. B* **358**, 1847-1862. (DOI 10.1098/rstb.2003.1407.)
- Houghton, A.J. (and 26 others) 2003 Invertebrate responses to the management of genetically modified herbicide-tolerant and conventional spring crops. II. Within-field epigeal and aerial arthropods. *Phil. Trans. R. Soc. Lond. B* **358**, 1863-1877. (DOI 10.1098/rstb.2003.1408.)
- Hawes, C. (and 18 others) 2003 Responses of plants and invertebrate trophic groups to contrasting herbicide regimes in the Farm Scale Evaluations of genetically modified herbicide-tolerant crops. *Phil. Trans. R. Soc. Lond. B* **358**, 1899-1913. (DOI 10.1098/rstb.2003.1406.)
- Heard, M.S. (and 12 others) 2003 Weeds in fields with contrasting conventional and genetically modified herbicide-tolerant crops. I. Effects on abundance and diversity. *Phil. Trans. R. Soc. Lond. B* **358**, 1819-1832. (DOI 10.1098/rstb.2003.1402.)
- Roy, D.B. (and 13 others) 2003 Invertebrates and vegetation of field margins adjacent to crops subject to contrasting herbicide regimes in the Farm Scale Evaluations of genetically modified herbicide-tolerant crops. *Phil. Trans. R. Soc. Lond. B* **358**, 1879-1898. (DOI 10.1098/rstb.2003.1404.)
